# Supplementary material for: 99mTc SPECT imaging agent based on cFLFLFK for the detection of FPR1 in inflammation
Source: Royal Society of Chemistry journal article supplement (doi:10.1039/c4dt02980a), 2015-01-01
Supplement: c4dt02980a1.pdf [file c4dt02980a1.pdf]

## <sup>99m</sup>Tc SPECT imaging agent based on cFLFLFK for the detection of FPR1 in inflammation

Graeme J. Stasiuk,<sup>a,b,c</sup> Paul M. Holloway,<sup>b</sup> Charlotte Rivas,<sup>a</sup> William Trigg,<sup>d</sup> Sajinder Kaur Luthra,<sup>d</sup> Veronique Morisson Iveson,<sup>d</sup> Felicity N. E. Gavins<sup>b\*</sup> and Nicholas J. Long,<sup>a\*</sup>

<sup>a</sup> Department of Chemistry, Imperial College London, South Kensington Campus, London SW7 2AZ, UK

<sup>b</sup> Division of Brain Sciences, Department of Medicine, Imperial College London, Du Cane Road, London, W12 ONN.

<sup>c</sup> School of Biological, Biomedical and Environmental Sciences, University of Hull, Cottingham Road, Hull, HU6 7RX

<sup>d</sup> GE Healthcare, The Grove Centre, White Lion Road, Amersham, Buckinghamshire, HP7 9LL UK.

\* Joint last author

### HPLC traces

HPLC was undertaken on an Agilent 1100 semi-preparative system, with a C-18 reverse phase column.

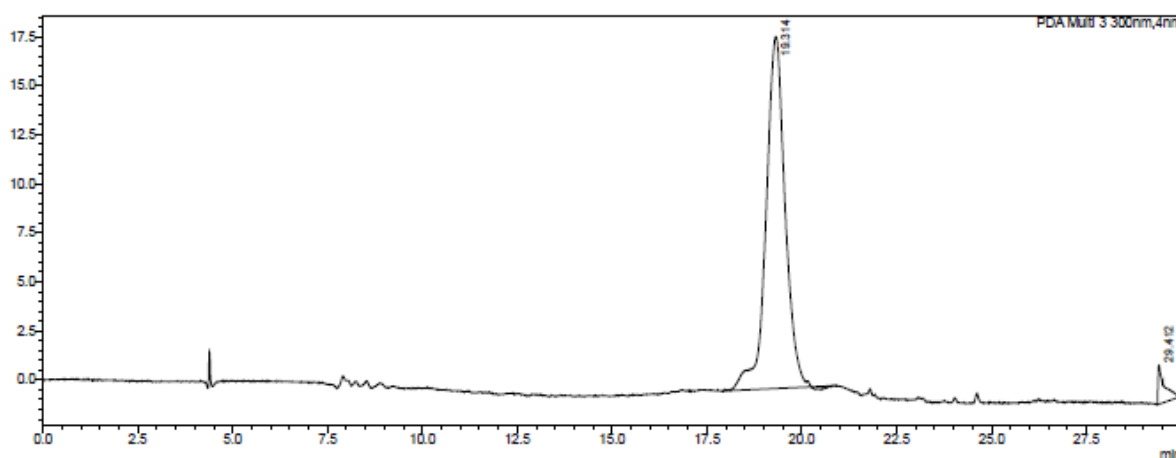

Figure 1. Analytical HPLC trace for **3**, cFLFLFK-PEG-NH<sub>2</sub>, using a C18 reverse phase column with a gradient of H<sub>2</sub>O 0.1% TFA: MeCN starting at 95:5 to 5:95 over 30 minutes. **3** has a retention time 19 minutes

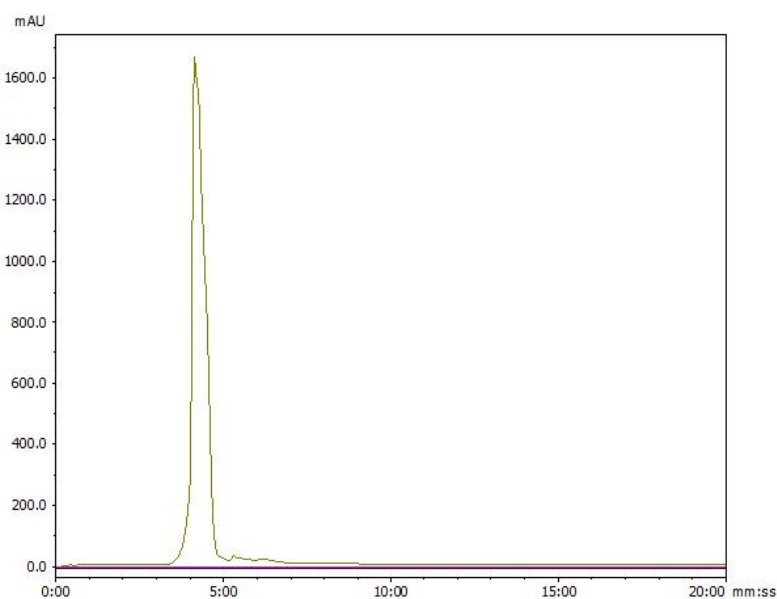

Figure 2. Analytical HPLC trace for **4**, cFLFLFK-PEG-TG, using a C18 reverse phase column with a gradient of H<sub>2</sub>O 0.1% TFA: MeCN starting at 50:50 to 5:95 over 20 minutes. **4** has a retention time 4.5 minutes

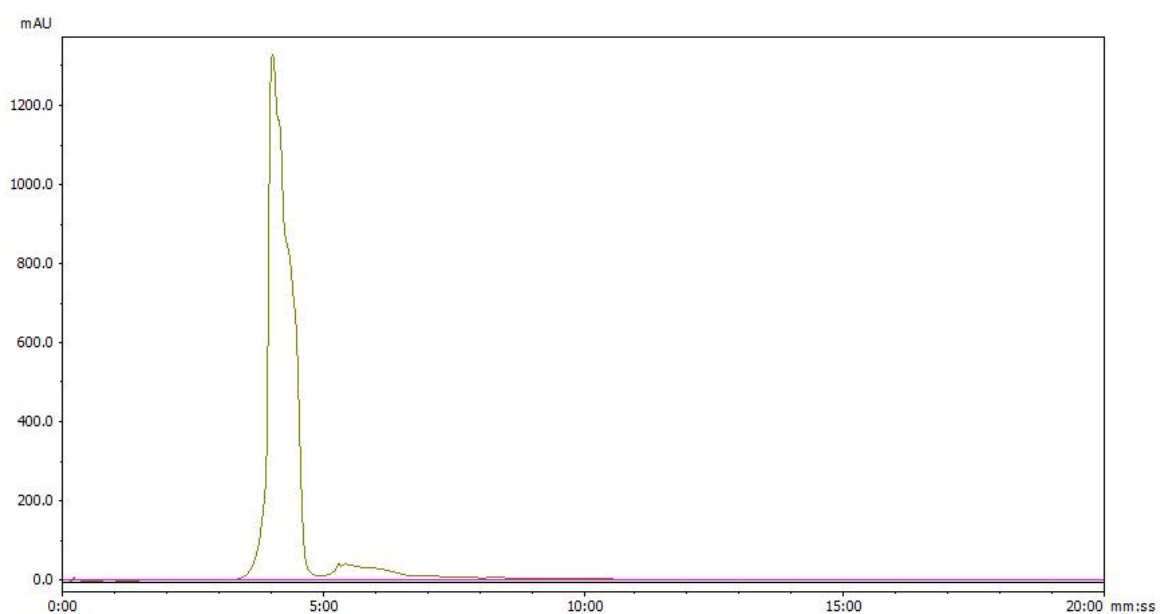

Figure 3. Crude analytical HPLC trace for **Re.1**, cFLFLFK-PEG-TG Re, using a C18 reverse phase column with a gradient of H<sub>2</sub>O 0.1% TFA: MeCN starting at 50:50 to 5:95 over 20 minutes. **Re.1** has a retention time of 4 minutes

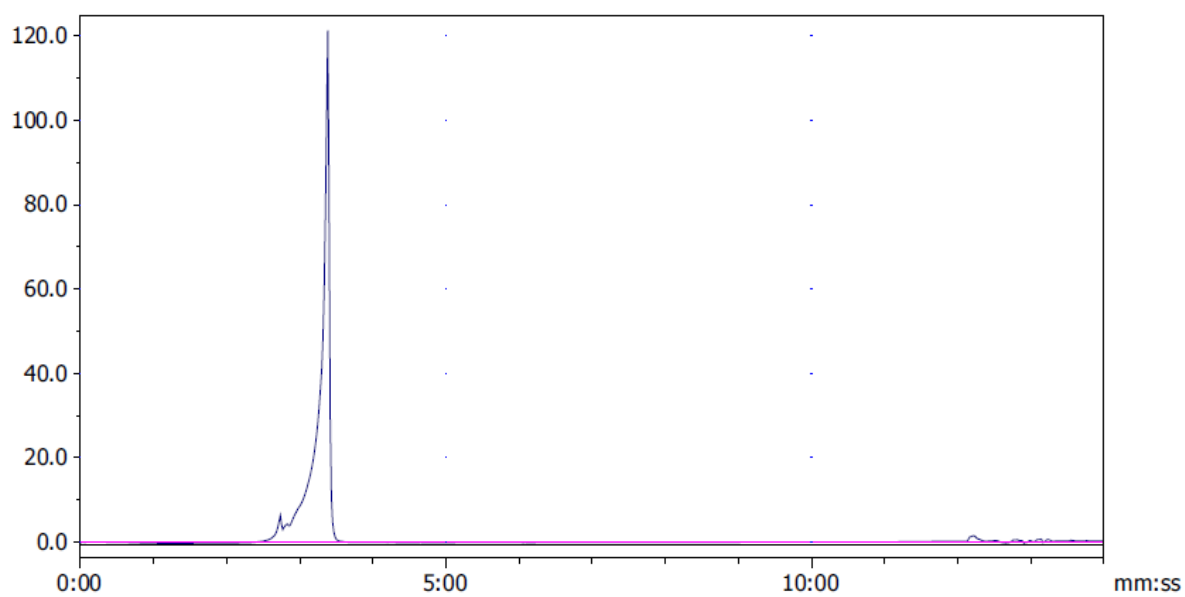

Figure 4. Analytical HPLC trace for **Re.tetraglycine**, using a C18 reverse phase column with an isocratic solvent system of H<sub>2</sub>O 0.1% TFA: MeCN 95:5 over 20 minutes. **Re.tetraglycine** has a retention time of 3.2 minutes

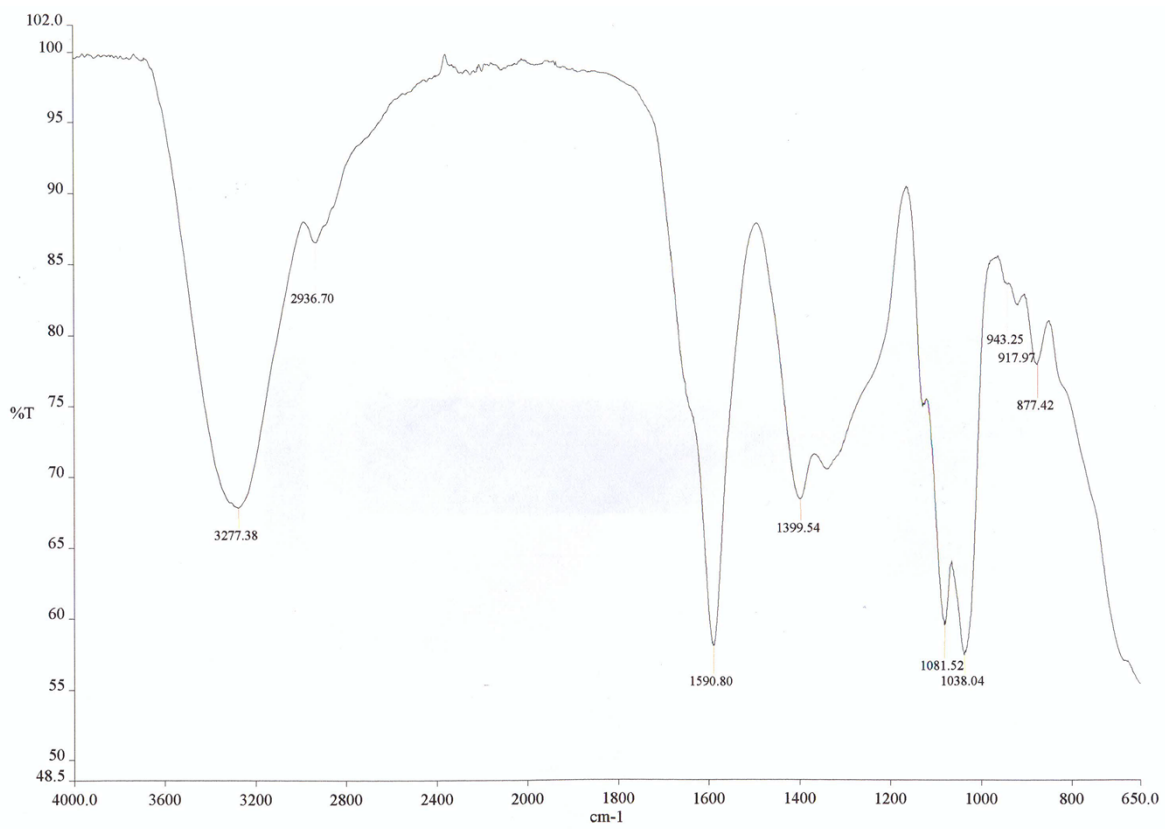

Figure 5. IR spectrum for *Re.tetraglycine* (nujol mull)

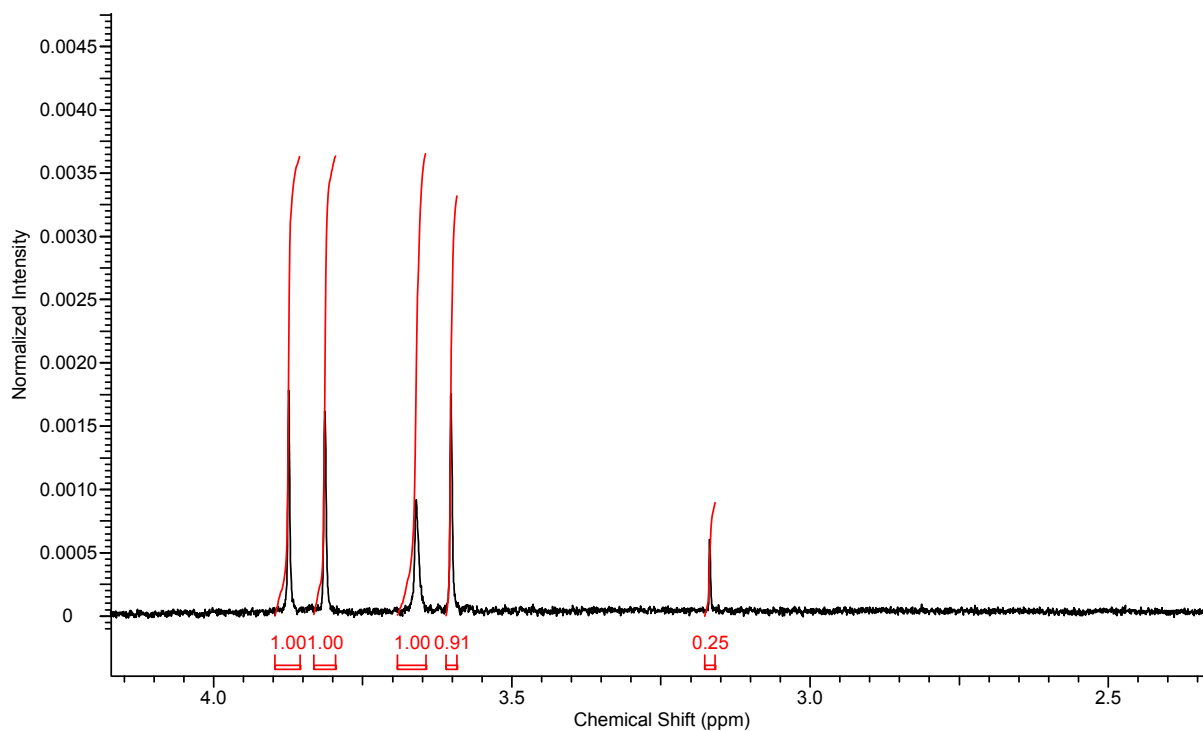

Figure 6.  $^1\text{H}$  NMR spectrum of *Re.tetraglycine* in  $\text{D}_2\text{O}$

### Radiolabelling experiments

The solution was passed down a G-10 Sephadex column to purify (2.1 ml), fractions of 0.5 ml were taken and tested for radioactivity in a gamma counter.

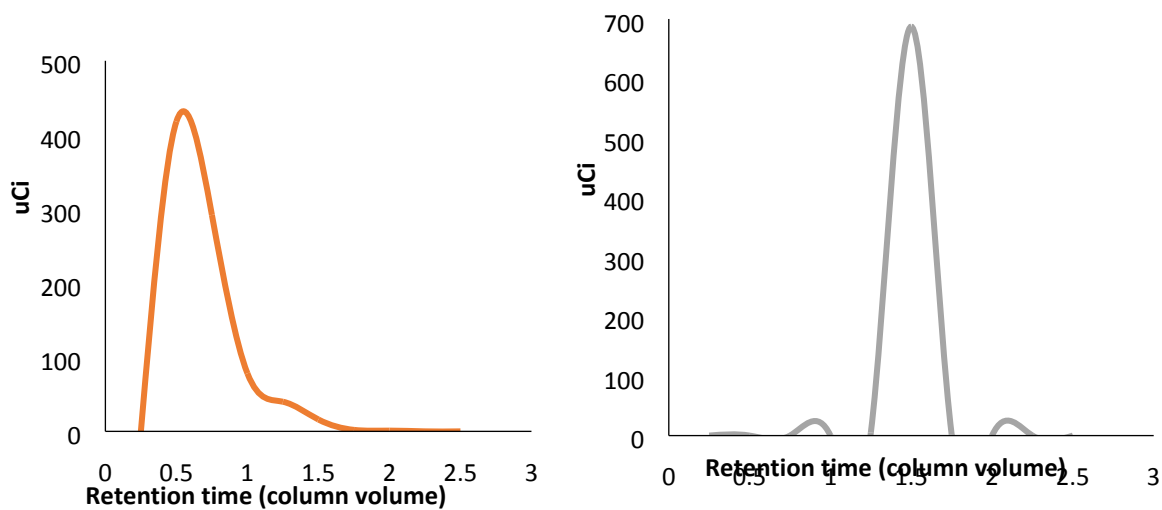

Figure 7. Gamma trace for *Tc.1* (left) and  $^{99\text{m}}\text{TcO}_4^-$  (right) using a G-10 Sephadex column with  $\text{H}_2\text{O}$ .
